# Supplementary material for: Deletion of the HAMP domains from the histidine kinase CaNik1p of Candida albicans or treatment with fungicides activates the MAP kinase Hog1p in S. cerevisiae transformants
Source: PubMed Central journal article supplement (PMC3848655; doi:10.1186/1471-2180-13-209), 2013-09-17

kDa

Marker

NIK

YES

$\Delta$ Ha

$\Delta$ HaH510

150

100

75

50

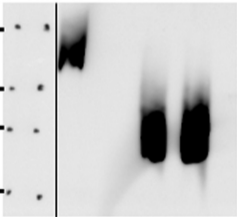

Supplement: 1471-2180-13-209-S1.pdf [file 1471-2180-13-209-S1.pdf]
